# Supplementary material for: Deconstruction of an African folk medicine uncovers a novel molecular strategy for therapeutic potassium channel activation
Source: PubMed Central journal article supplement — Sci Adv. 2018 Nov 14;4(11):eaav0824. doi: 10.1126/sciadv.aav0824 (PMC6235520; doi:10.1126/sciadv.aav0824), 2018-11-14
Supplement: aav0824_SM.pdf [file aav0824_SM.pdf]

## Supplementary Materials for

### **Deconstruction of an African folk medicine uncovers a novel molecular strategy for therapeutic potassium channel activation**

Angele M. De Silva, Rían W. Manville\*, Geoffrey W. Abbott\*

\*Corresponding author. Email: [abbottg@uci.edu](mailto:abbottg@uci.edu) (G.W.A.); [rmanvill@uci.edu](mailto:rmanvill@uci.edu) (R.W.M.)

Published 14 November 2018, *Sci. Adv.* **4**, eaav0824 (2018)

DOI: 10.1126/sciadv.aav0824

#### **This PDF file includes:**

- Fig. S1. Effects of CPT1 on KCNQ1 channels.
- Fig. S2. Effects of MTX on KCNQ1 channels.
- Fig. S3. Effects of MTX on KCNQ1/KCNE1 channels.
- Fig. S4. Effects of MTX on KCNQ1/SMIT1 channels.
- Fig. S5. Interaction of MTX with permeant ions and UCL2077.
- Fig. S6. MTX and CPT1 bind to R243 on the KCNQ1 S4-S5 linker.
- Fig. S7. Effects of MTX on KCNQ2/KCNQ3 channels.
- Fig. S8. Effects of MTX on KCNQ2-R213A/KCNQ3 channels.
- Fig. S9. Effects of MTX on KCNQ2/KCNQ3-R242A channels.
- Fig. S10. Effects of MTX on KCNQ2-R213A/KCNQ3-R242A channels.

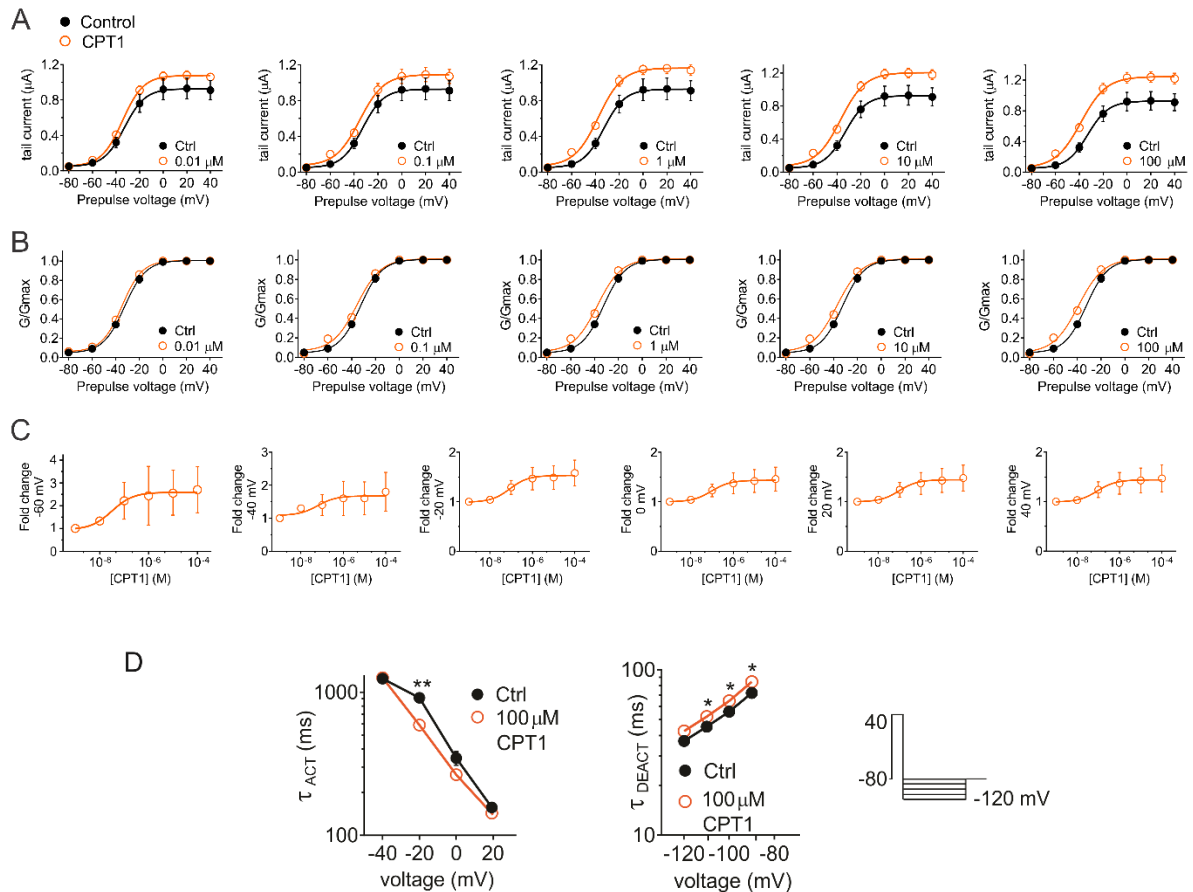

**Fig. S1. Effects of CPT1 on KCNQ1 channels.** (A) Mean tail current versus prepulse voltage relationship for KCNQ1 channels in the absence (black) and presence (orange) of CPT1,  $n = 4-6$ . (B) Normalized tail current versus prepulse voltage relationships as in panel A,  $n = 4-6$ . (C) Dose response of KCNQ1 channels between  $-40$  and  $+40$  mV,  $n = 4-6$ . Error bars indicate SEM. (D) Mean activation (*left*) and deactivation (*right*) rates versus voltage for KCNQ1 before (Ctrl) and after wash-in of CPT1 ( $100 \mu\text{M}$ ) ( $n = 6-7$ ; \* $P < 0.05$ ; \*\* $P < 0.01$ ). Activation rate was quantified using voltage protocol as in Fig. 1D. Deactivation rate was quantified using voltage protocol shown on right.

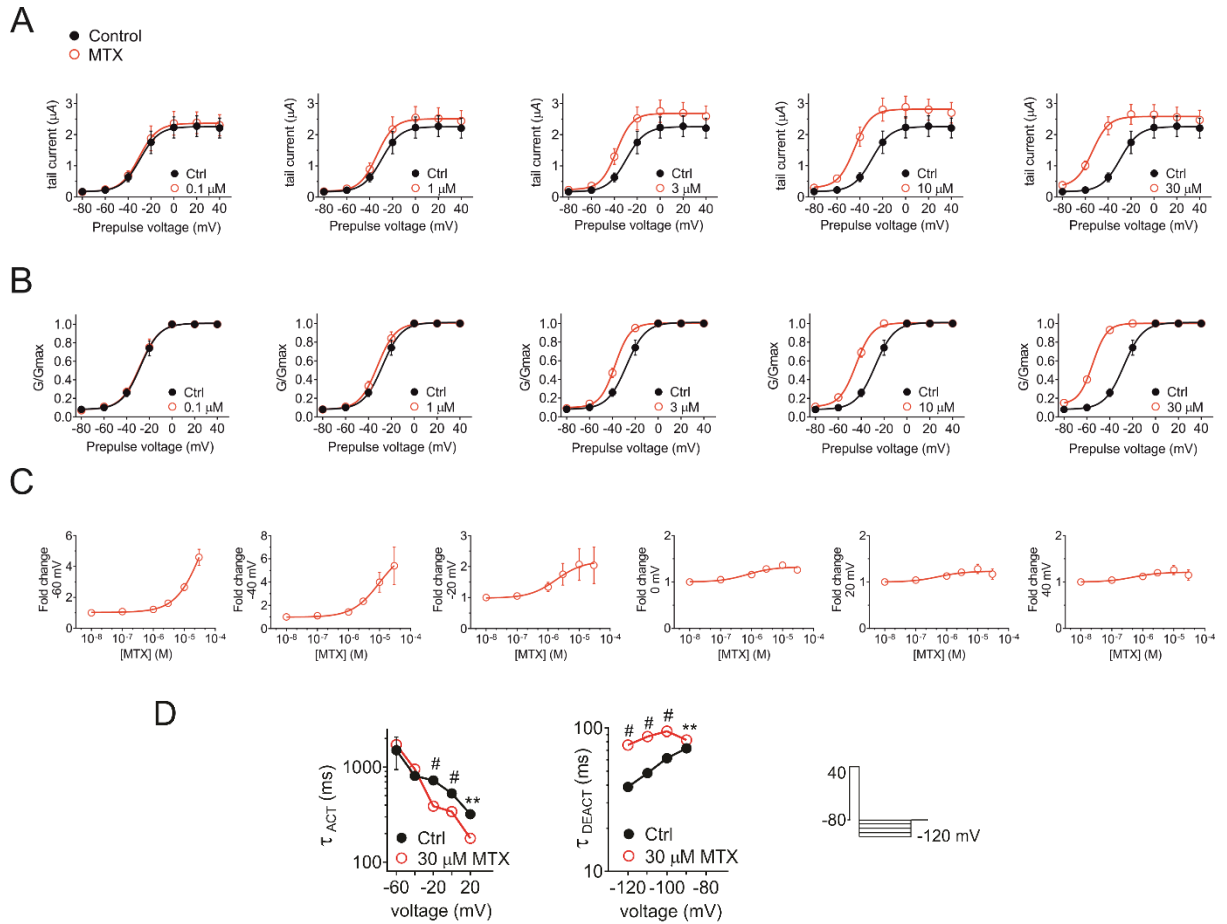

**Fig. S2. Effects of MTX on KCNQ1 channels.** (A) Mean tail current versus prepulse voltage relationship for KCNQ1 channels in the absence (black) and presence (red) of MTX,  $n = 7$ . (B) Normalized tail current versus prepulse voltage relationships as in panel A,  $n = 7$ . (C) Dose response of KCNQ1 channels between  $-40$  and  $+40$  mV,  $n = 7$ . Error bars indicate SEM. (D) Mean activation (*left*) and deactivation (*right*) rates versus voltage for KCNQ1 before (Ctrl) and after wash-in of MTX ( $30 \mu\text{M}$ ) ( $n = 7$ ; \* $P < 0.05$ ; \*\* $P < 0.01$ ; #  $P < 0.0001$ ). Activation rate was quantified using voltage protocol as in Fig. 1D. Deactivation rate was quantified using voltage protocol shown on right.

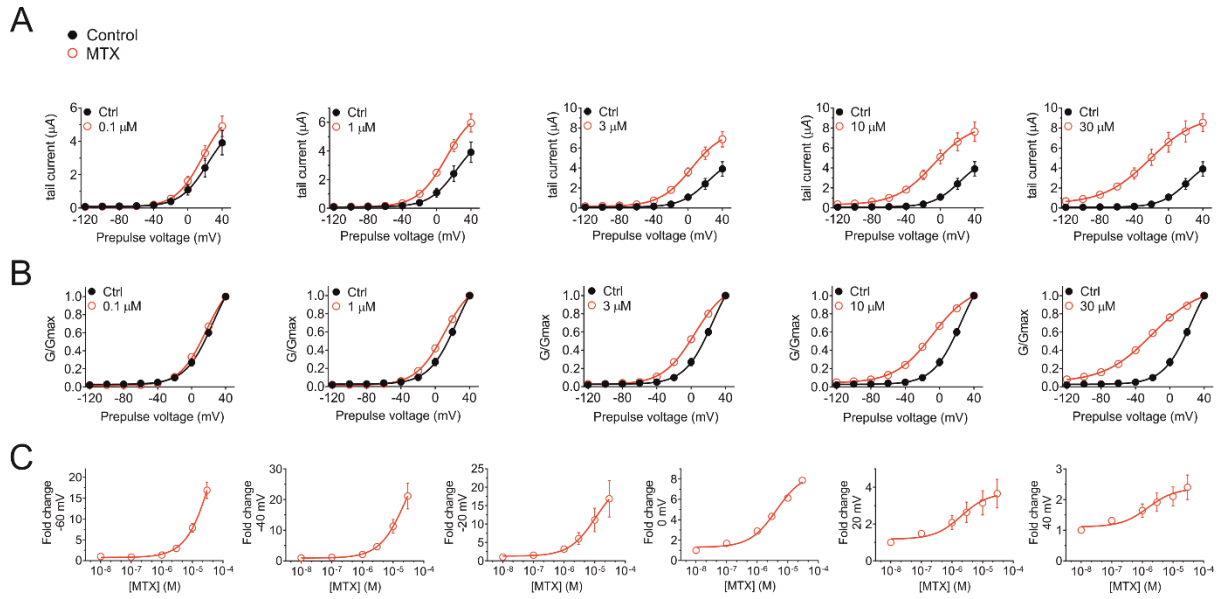

**Fig. S3. Effects of MTX on KCNQ1/KCNE1 channels. (A)** Mean tail current versus prepulse voltage relationship for KCNQ1/KCNE1 channels in the absence (black) and presence (red) of MTX,  $n = 5$ . **(B)** Normalized tail current versus prepulse voltage relationships as in panel A,  $n = 5$ . **(C)** Dose response of KCNQ1/KCNE1 channels between  $-40$  and  $+40$  mV,  $n = 5$ . Error bars indicate SEM.

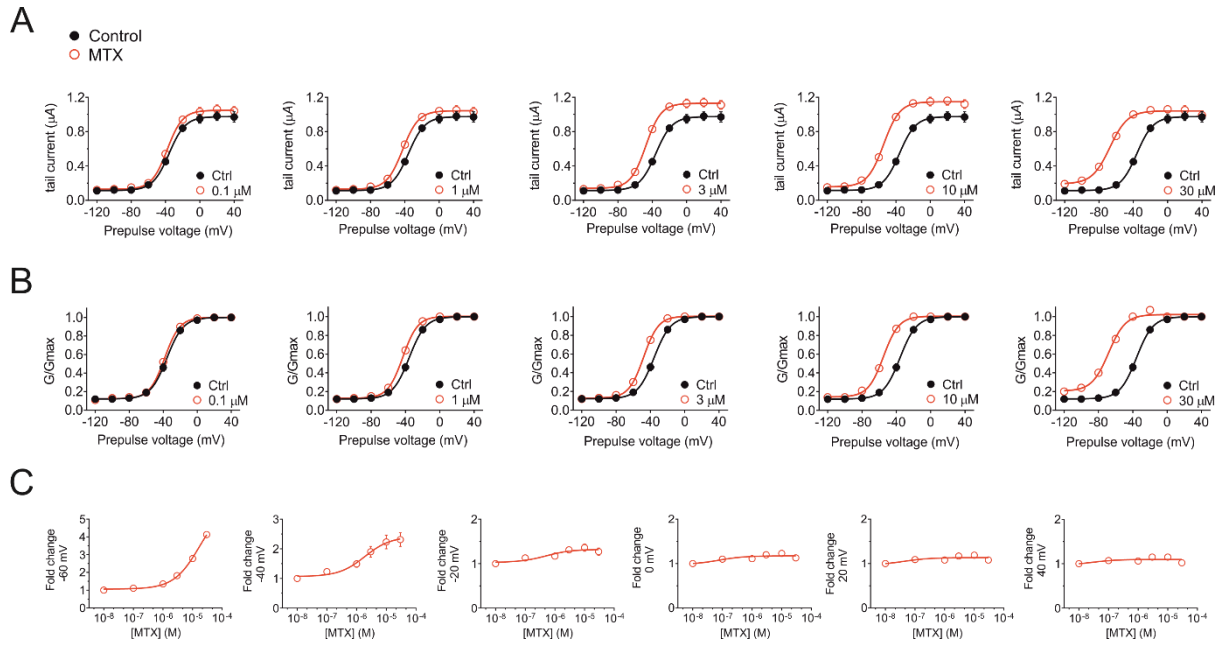

**Fig. S4. Effects of MTX on KCNQ1/SMIT1 channels. (A)** Mean tail current versus prepulse voltage relationship for KCNQ1/SMIT1 channels in the absence (black) and presence (red) of MTX,  $n = 5$ . **(B)** Normalized tail current versus prepulse voltage relationships as in panel A,  $n = 5$ . **(C)** Dose response of KCNQ1/SMIT1 channels between  $-40$  and  $+40$  mV,  $n = 5$ . Error bars indicate SEM.

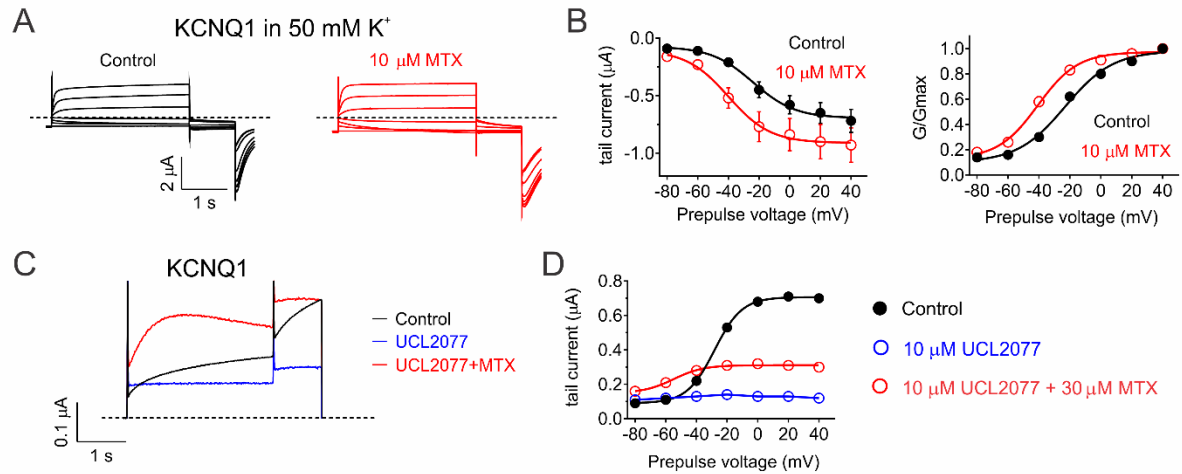

**Fig. S5. Interaction of MTX with permeant ions and UCL2077.**

All error bars indicate SEM. **(A)**. Averaged KCNQ1 traces with 50 mM bath K<sup>+</sup> in the absence (Control) or presence of 10 μM MTX ( $n = 7$ ). Dashed line indicates zero current level in this and all following current traces. **(B)**. Mean effects of 10 μM MTX in 50 mM bath K<sup>+</sup> on KCNQ1 raw tail currents at -30 mV after prepulses as indicated (*left*) and  $G/G_{max}$  (*right*) (from traces as in A;  $n = 7$ ). **(C)**. Averaged KCNQ1 traces, in the absence (Control) or presence of UCL2077 (10 μM) alone or with 30 μM MTX ( $n = 6-11$ ). Cells were held at -80 mV, pulsed to -40 mV for 3 s, followed by a -30 mV tail pulse (1 s). **(D)**. Mean KCNQ1 raw tail currents at -30 mV after prepulses as indicated, in the absence (Control) or presence of UCL2077 (10 μM) alone or with 30 μM MTX (from traces as in C;  $n = 6-11$ ).

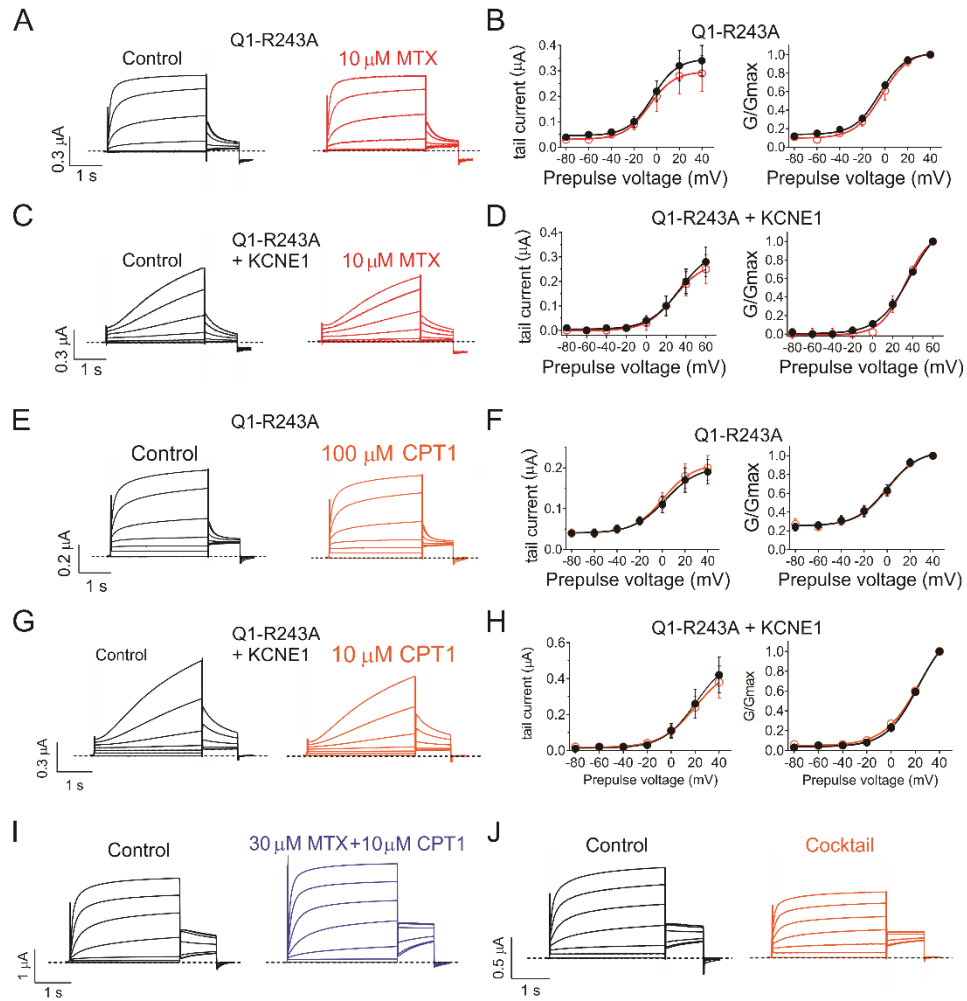

**Fig. S6. MTX and CPT1 bind to R243 on the KCNQ1 S4-S5 linker.** All error bars indicate SEM. **(A).** Averaged KCNQ1-R243A traces in the absence (Control) or presence of 10  $\mu\text{M}$  MTX ( $n = 8$ ). Dashed line indicates zero current level in this and all following current traces. **(B).** Mean effects of 10  $\mu\text{M}$  MTX on KCNQ1-R243A raw tail currents at -30 mV after prepulses as indicated (*left*) and  $G/G_{\text{max}}$  (*right*). **(C).** Averaged KCNQ1-R243A/KCNE1 traces in the absence (Control) or presence of 10  $\mu\text{M}$  MTX ( $n = 5$ ). **(D).** Mean effects of 10  $\mu\text{M}$  MTX (from traces as in **C**;  $n = 5$ ) on KCNQ1-R243A/KCNE1 raw tail currents at -30 mV after prepulses as indicated (*left*) and  $G/G_{\text{max}}$  (*right*). **(E).** Averaged KCNQ1-R243A traces in the absence (Control) or presence of 100  $\mu\text{M}$  CPT1 ( $n = 10$ ). **(F).** Mean effects of 100  $\mu\text{M}$  CPT1 (as in **E**;  $n = 10$ ) on KCNQ1-R243A raw tail currents at -30 mV after prepulses as indicated (*left*) and  $G/G_{\text{max}}$  (*right*). **(G).** Averaged KCNQ1-R243A/KCNE1 traces in the absence (Control) or presence of 100  $\mu\text{M}$  CPT1 ( $n = 5$ ). **(H).** Mean effects of 100  $\mu\text{M}$  CPT1 (as in **G**;  $n = 5$ ) on KCNQ1-R243A/KCNE1 raw tail currents (*left*) and  $G/G_{\text{max}}$  (*right*) at -30 mV after prepulses as indicated. **(I).** Averaged KCNQ1 traces in the absence (Control) or presence of 30  $\mu\text{M}$  MTX + 10  $\mu\text{M}$  CPT1 ( $n = 5$ ). **(J).** Averaged KCNQ1 traces in the absence (Control) or presence of *M. oppositifolius* leaf extract cocktail ( $n = 6$ ).

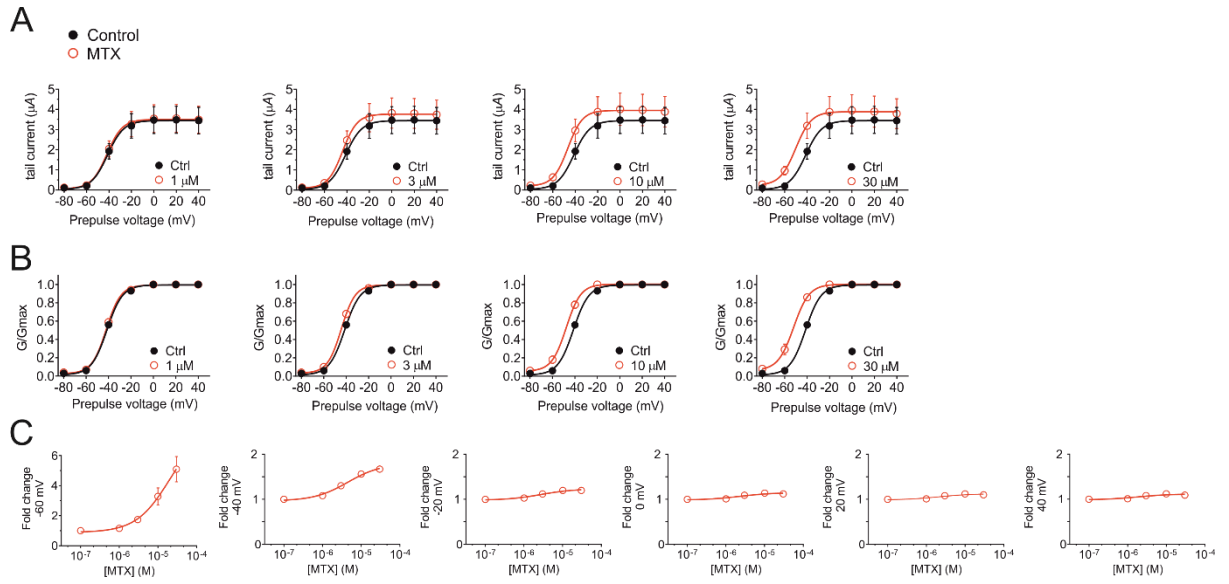

**Fig. S7. Effects of MTX on KCNQ2/KCNQ3 channels.** (A) Mean tail current versus prepulse voltage relationship for KCNQ2/KCNQ3 channels in the absence (black) and presence (red) of MTX,  $n = 5$ . (B) Normalized tail current versus prepulse voltage relationships as in panel A,  $n = 5$ . (C) Dose response of KCNQ2/KCNQ3 channels between  $-40$  and  $+40$  mV,  $n = 5$ . Error bars indicate SEM.

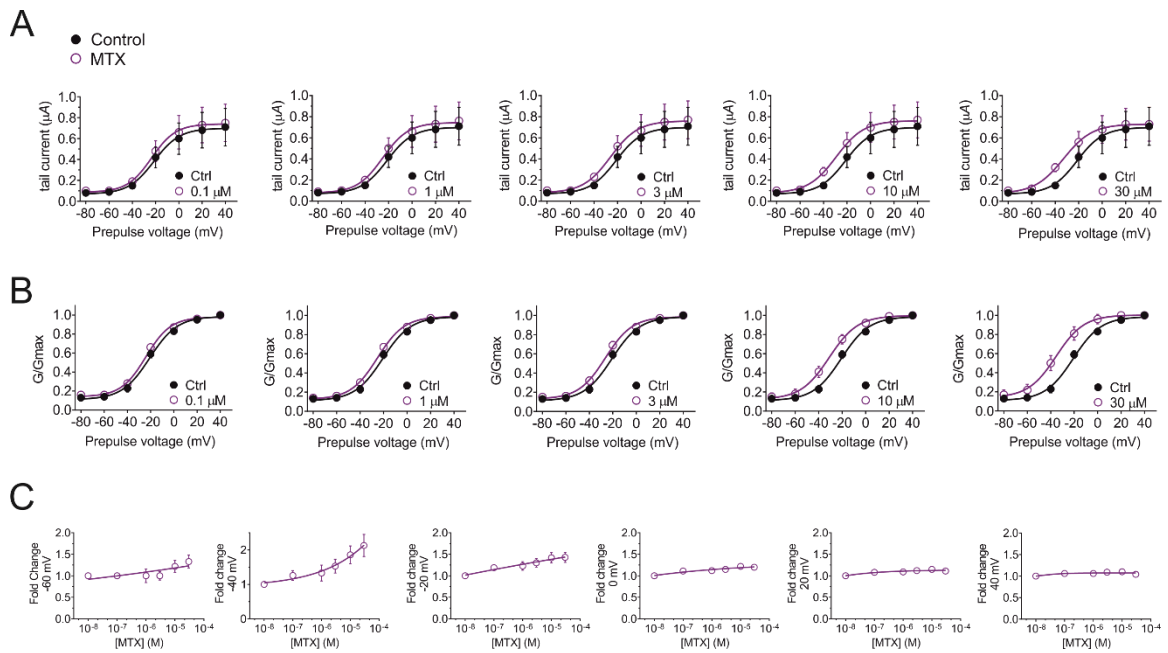

**Fig. S8. Effects of MTX on KCNQ2-R213A/KCNQ3 channels.** (A) Mean tail current versus prepulse voltage relationship for KCNQ2-R213A/KCNQ3 channels in the absence (black) and presence (red) of MTX,  $n = 6$ . (B) Normalized tail current versus prepulse voltage relationships as in panel A,  $n = 6$ . (C) Dose response of KCNQ2-R213A/KCNQ3 channels between  $-40$  and  $+40$  mV,  $n = 6$ . Error bars indicate SEM.



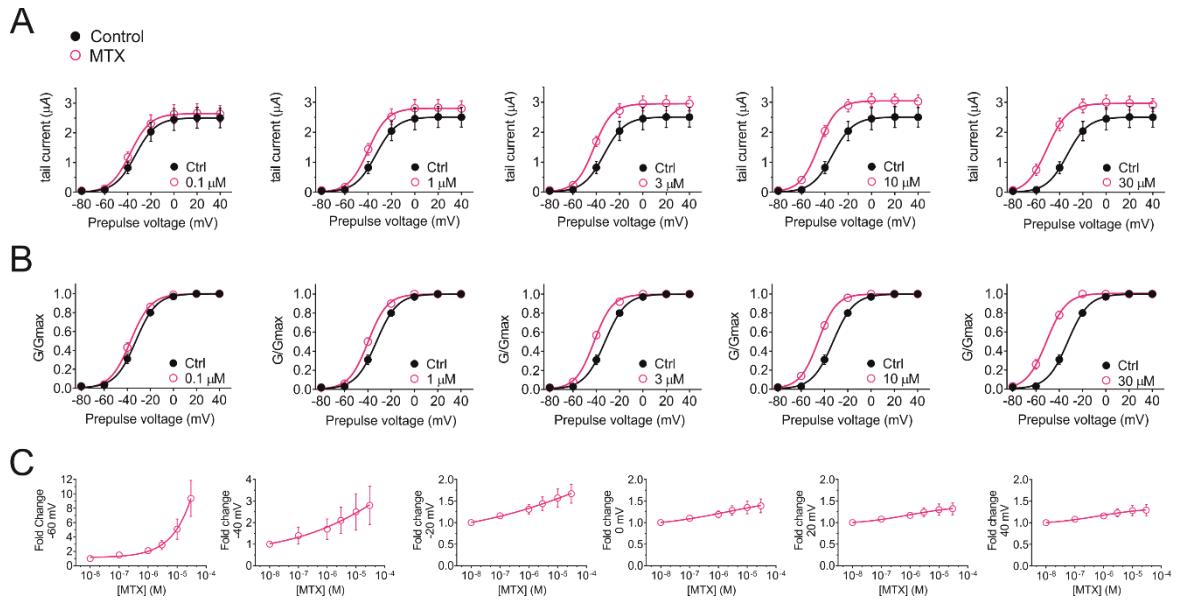

**Fig. S9. Effects of MTX on KCNQ2/KCNQ3-R242A channels. (A)** Mean tail current versus prepulse voltage relationship for KCNQ2/KCNQ3-R242A channels in the absence (black) and presence (red) of MTX,  $n = 6$ . **(B)** Normalized tail current versus prepulse voltage relationships as in panel A,  $n = 6$ . **(C)** Dose response of KCNQ2/KCNQ3-R242A channels between  $-40$  and  $+40$  mV,  $n = 6$ . Error bars indicate SEM.

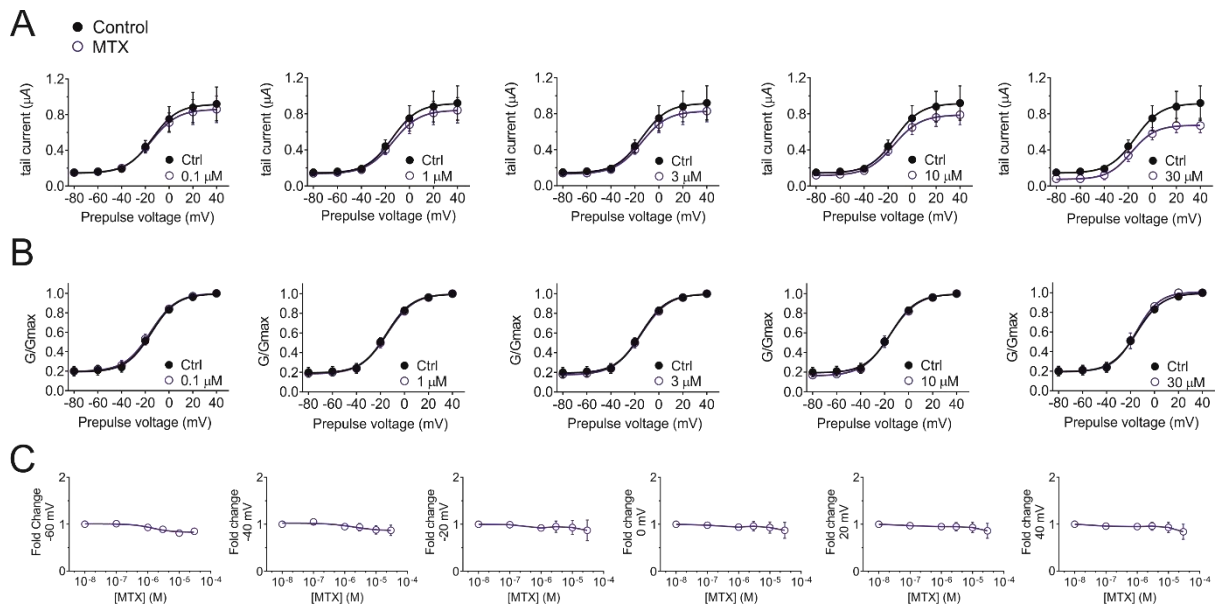

**Fig. S10. Effects of MTX on KCNQ2-R213A/KCNQ3-R242A channels. (A)** Mean tail current versus prepulse voltage relationship for KCNQ2-R213A/KCNQ3-R242A channels in the absence (black) and presence (red) of MTX,  $n = 5$ . **(B)** Normalized tail current versus prepulse voltage relationships as in panel A,  $n = 5$ . **(C)** Dose response of KCNQ2-R213A/KCNQ3-R242A channels between  $-40$  and  $+40$  mV,  $n = 5$ . Error bars indicate SEM.
